Published by

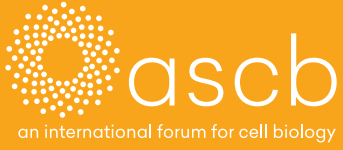

Editorial Partner

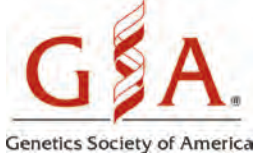

Volume 15, Spring 2016

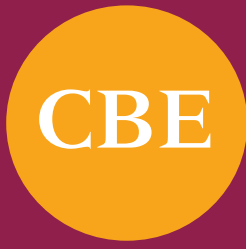

# Life Sciences Education

[www.lifescied.org](http://www.lifescied.org)

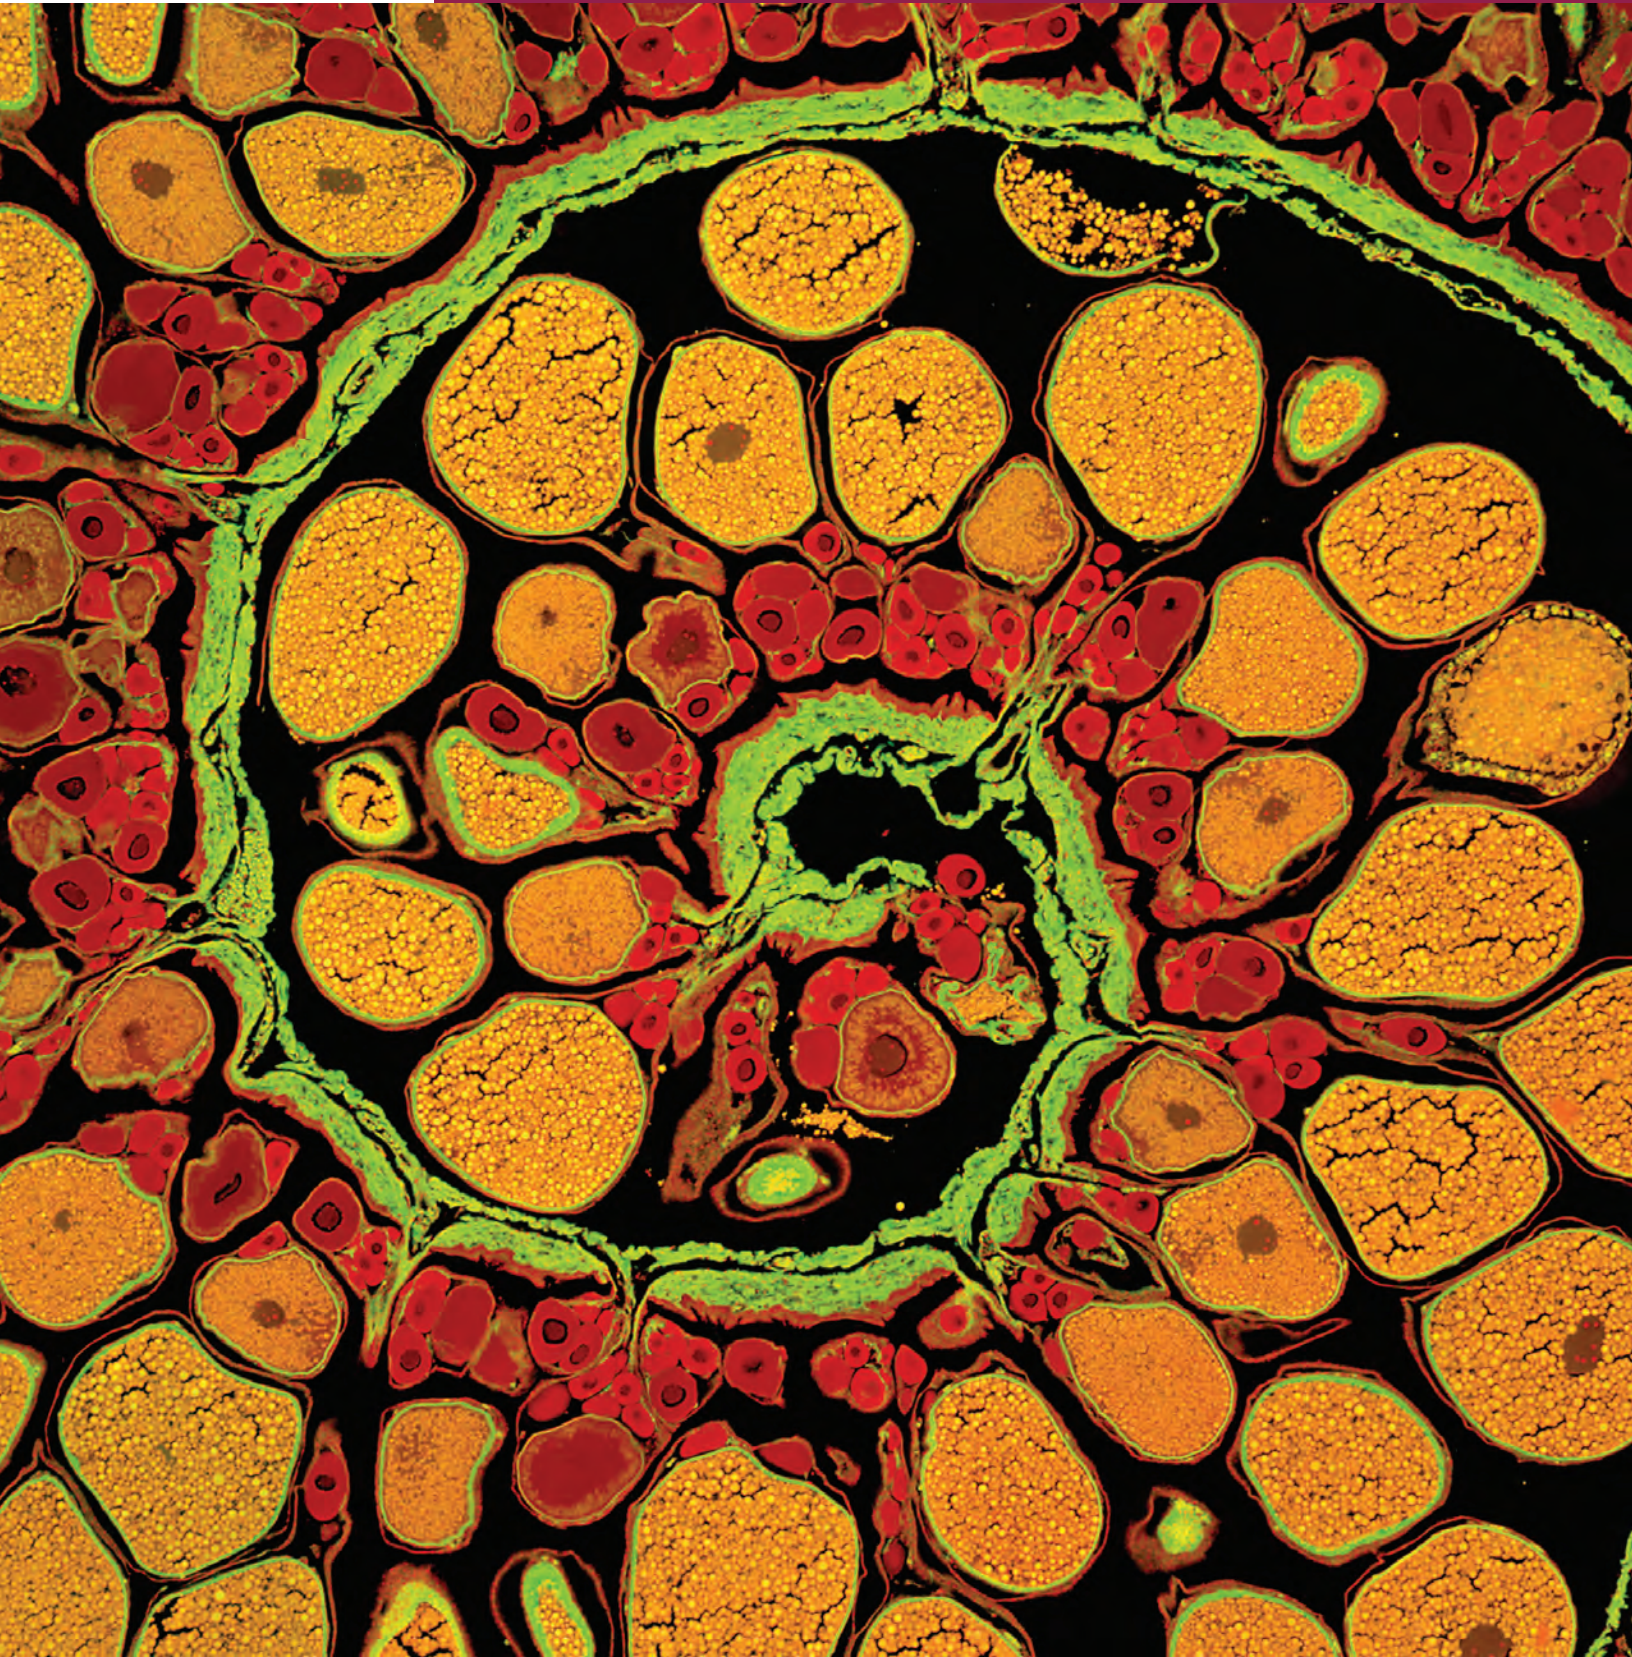

Source: https://www.lifescied.org/doi/suppl/10.1187/lse.2016.15.issue-1/suppl_file/front.pdf
